# Supplementary material
Source: PubMed Central journal article supplement (PMC10838150)
Supplement: NIHMS1867454-supplement-Supl_info.pdf [file NIHMS1867454-supplement-Supl_info.pdf]

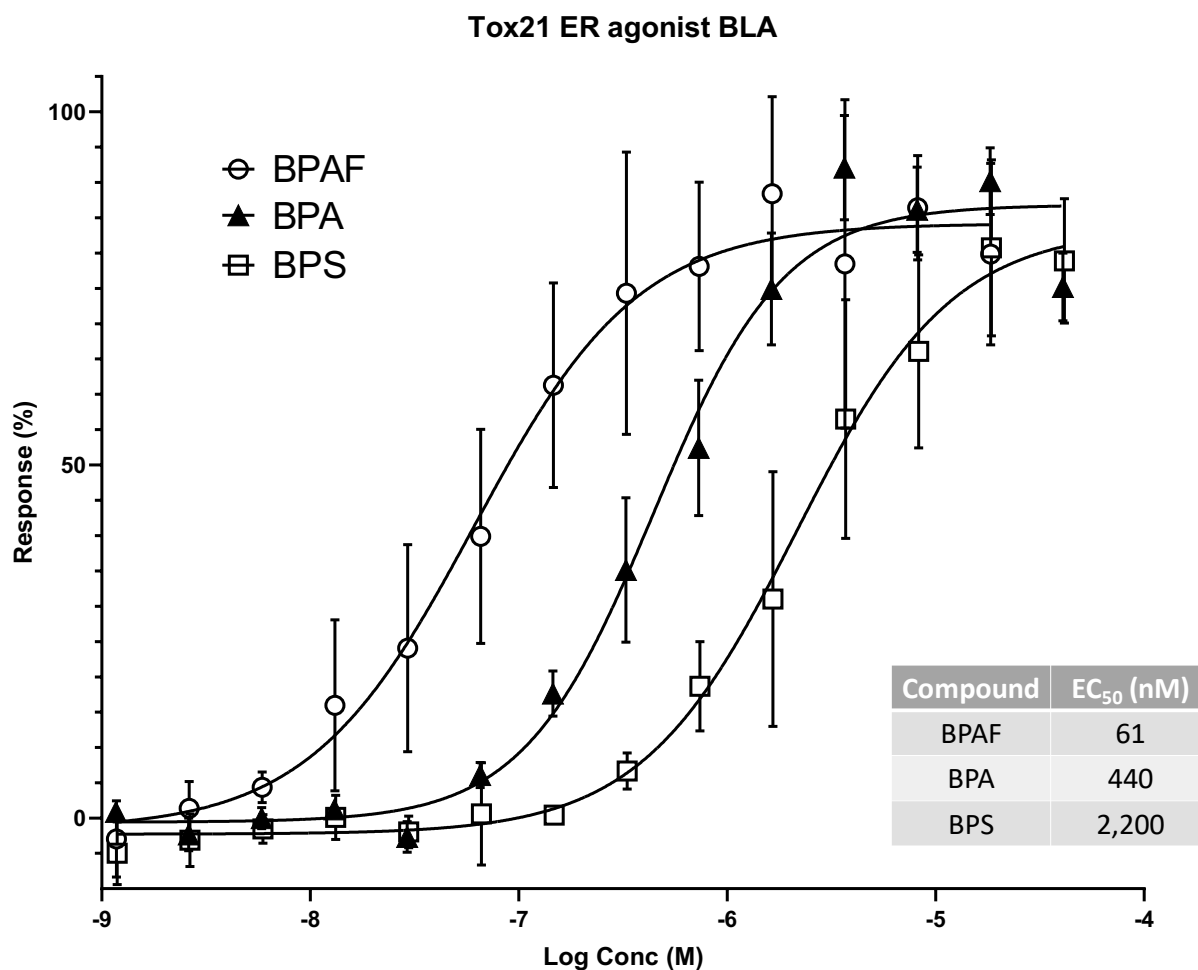

**Supplemental Figure 1. Tox21 ER agonist bioactivity screening data for BPAF, BPS, & BPA.**

Tox21 estrogen receptor agonist assays (i.e., tox21-er-luc-bg1-4e2-agonist) curve overlays for representative experimental runs with BPAF, BPS, and BPA demonstrating the relative potency differences of estrogen receptor agonist activity with these structural analogues. Data represent normalized responses of 3 independent experimental runs in the form of mean  $\pm$  SD. Curve overlay comparing Tox21 estrogen receptor agonist activities for bisphenol A, bisphenol AF, and bisphenol S concentration as archived in <https://tripod.nih.gov/tox21>, and published in Sci Rep. 2014; 4: 5664.

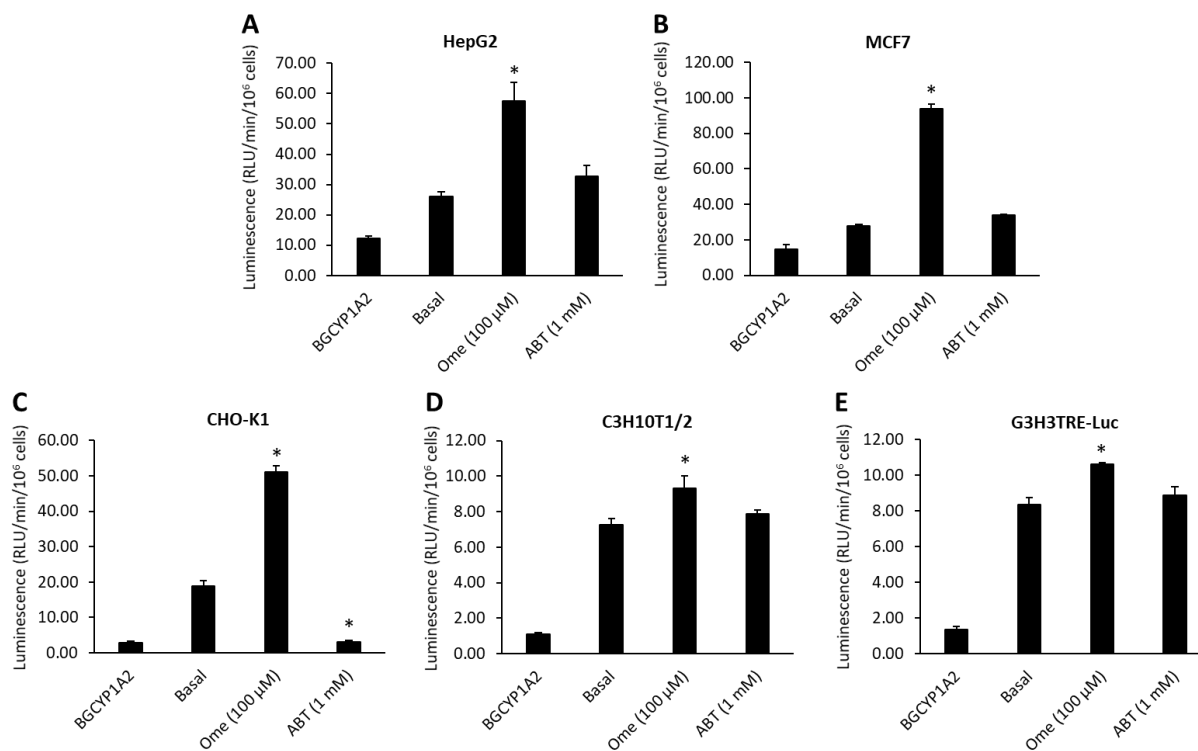

**Supplemental Figure 2. P450 Glo CYP1A2 induction and inhibition in Tox21 cell lines.**

Tox21 cell lines were cultured as a monolayer in a 96-well plate at ~50,000 cells/well for 24 hours. Cells were subsequently pretreated with the vehicle 0.1% DMSO (Basal), or OMP (100 μM), a prototype CYP1A2 inducer, or ABT (1 mM), a pan-P450 inhibitor, for 24 hours. Assay background (BGCYP1A2) was measured in medium without cells. After incubations, culture media were replaced with fresh medium containing Luciferin-1A2 P450-Glo substrate (6 μM), and cells were incubated for an additional 60 minutes. CYP450-Glo bioluminescent assays were performed. HepG2 cells (A). MCF7 cells (B). CHO-K1 cells (C). C3H10T1/2 cells (D). G3H3TRE-Luc cells (E). Data are presented as the mean ± SD (n = 4). \* p < 0.05 compared with basal.

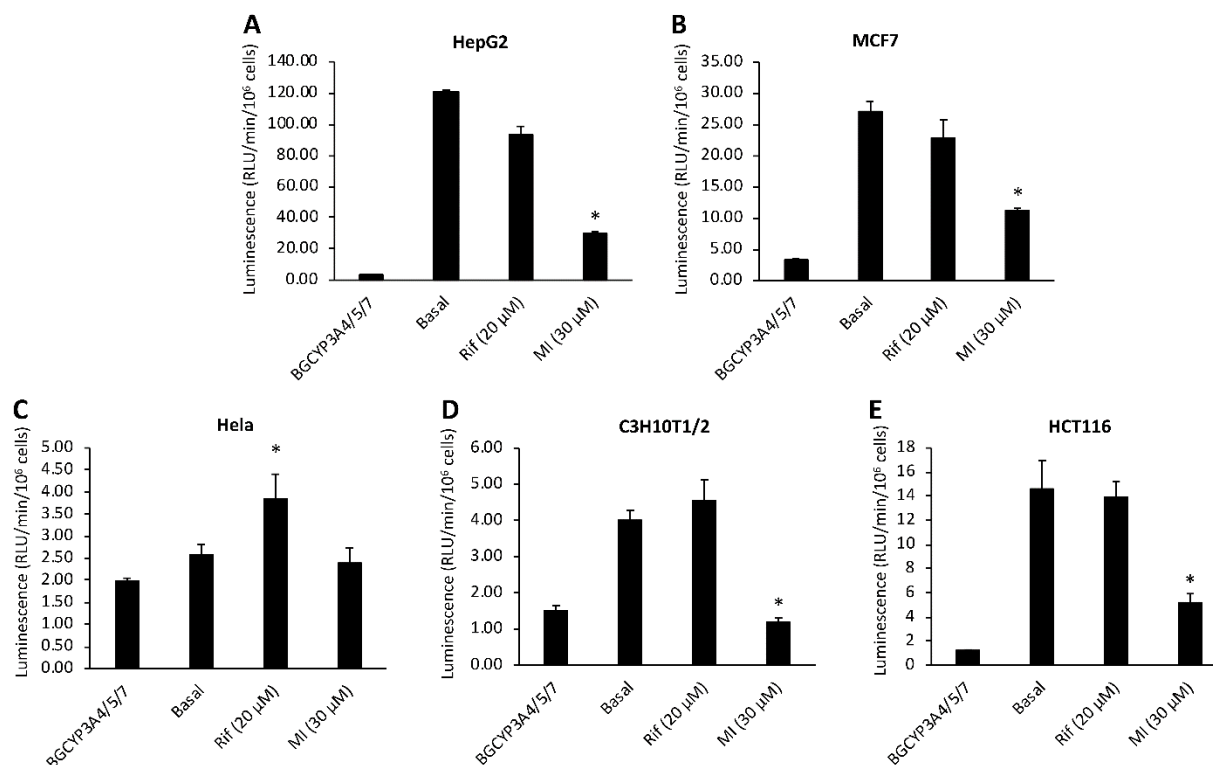

**Supplemental Figure 3. P450 Glo CYP3A4 induction and inhibition in Tox21 cell lines.**

Tox21 cell lines were cultured as a monolayer in a 96-well plate at ~50,000 cells/well for 24 hours. Then, cells were pretreated with the vehicle 0.1% DMSO (Basal), or RIF (20 μM), well known CYP3A4 inducer, or MI, (30 μM), a CYP3A4 inhibitor, for 24 hours. Assay background (BGCYP3A4) was measured in medium without cells. After treatments the medium was replaced with fresh medium containing Luciferin-3A4 P450-Glo substrate (3 μM), and cells were incubated for an additional 60 minutes. CYP450-Glo bioluminescent assays were performed. HepG2 cells (A). MCF7 (B). HeLa cells (C). C3H10T1/2 cells (D). HCT116 cells(E). Data are presented as the mean ± SD (n = 4). \* p < 0.05 compared with basal.

**Supplementary Table 1. Analytes and Stable Label Internal Standards**

| <b>Analyte or ISTD</b>                                       | <b>Manufacturer</b>                                 | <b>Catalog #</b> | <b>Lot #</b> |
|--------------------------------------------------------------|-----------------------------------------------------|------------------|--------------|
| Acetaminophen                                                | Sigma, St. Louis,<br>MO                             | A7085            | 053K0040     |
| <sup>13</sup> C <sub>2</sub> - <sup>15</sup> N-Acetaminophen | Cambridge Isotope<br>Laboratories,<br>Tewksbury, MA | CNLM-3726-1.2    | SDED-003     |
| Hydroxybupropion                                             | BD Gentest,<br>Franklin Lakes, NJ                   | 451711           | 00081        |
| Hydroxybupropion-d <sub>6</sub>                              | Cerilliant, Round<br>Rock, TX                       | H-062            | FN01051503   |
| 1'-Hydroxymidazolam                                          | BD Gentest                                          | 451038           | 51142        |
| 1'-Hydroxymidazolam-d <sub>4</sub>                           | Cerilliant                                          | 61-546           | FN092807-02  |

## Supplementary Table 2. LC/MS/MS Method Instrumentation and Analysis Parameters

### Instrumentation

|                          |                                                                                                 |
|--------------------------|-------------------------------------------------------------------------------------------------|
| <b>Mass Spectrometer</b> | API 5000 Triple Quadrupole Mass Spectrometer with Turboion Spray source (SCIEX, Framingham, MA) |
| <b>HPLC</b>              | Waters Acquity UPLC with autosampler and column compartment (Waters, Milford, MA)               |

### Chromatography Conditions

|                         |                                                                                                                                                            |
|-------------------------|------------------------------------------------------------------------------------------------------------------------------------------------------------|
| <b>Column</b>           | Phenomenex Luna C18 (50 x 2 mm, 5 $\mu$ m) with C18 guard cartridge (Phenomenex, Torrance, CA)                                                             |
| <b>Injection Volume</b> | 10 microliters                                                                                                                                             |
| <b>Mobile Phase</b>     | A: 0.05% Formic Acid in 5 mM Ammonium Formate, B: 0.05% Formic Acid in Acetonitrile:Methanol (95:5)                                                        |
| <b>Flow Rate</b>        | 0.7 mL/min                                                                                                                                                 |
| <b>Gradient</b>         | Initially 2% B, change linearly to 5% B over 0.5 min. Change linearly to 71% B over 2 min, then return to initial conditions over 0.5 min. Run time 5 min. |

**Supplementary Table 3. MS Parameters: Positive TurboSpray Ionization**

| <b>Parameter</b>              | <b>Acetaminophen</b> | <b>Hydroxybupropion</b> | <b>1-Hydroxymidazolam</b> |
|-------------------------------|----------------------|-------------------------|---------------------------|
| Polarity                      | Positive             | Positive                | Positive                  |
| Ion Source                    | TurboSpray           | TurboSpray              | TurboSpray                |
| Resolution                    | Unit                 | Unit                    | Unit                      |
| Curtain Gas                   | 10                   | 10                      | 10                        |
| Gas 1                         | 50                   | 50                      | 50                        |
| Gas 2                         | 50                   | 50                      | 50                        |
| IonSpray Voltage              | 2500.00              | 2500.00                 | 2500.00                   |
| Source Temperature            | 650                  | 650                     | 650                       |
| Collision Gas (CAD)           | 8                    | 8                       | 8                         |
| Entrance Potential            | 10.00                | 10.00                   | 10.00                     |
| Declustering Potential        | 41                   | 46                      | 76                        |
| Collision Cell Exit Potential | 18                   | 16                      | 31                        |
| Collision Energy              | 23                   | 17                      | 24                        |
| Analyte MRM                   | 151.95 → 110.0       | 256.12 → 238.0          | 342.07 → 324.0            |
| Internal Standard MRM         | 154.95 → 111.0       | 262.10 → 243.8          | 346.00 → 328.0            |

**Supplementary Table 4. BPAF Phase II Metabolites Inclusion List**

| Metabolite | Mass (m/z) |
|------------|------------|
| BPAF-S     | 415.05122  |
| BPAF-2S    | 494.96485  |
| BPAF-G     | 511.08331  |
| BPAF-2G    | 687.11540  |
| BPAF-GS    | 591.04012  |

**Supplementary Table 5. BPS Phase II Metabolites Inclusion List**

| <b>Metabolite</b> | <b>Mass (m/z)</b> |
|-------------------|-------------------|
| BPS-S             | 328.97952         |
| BPS-2S            | 408.93633         |
| BPS-G             | 425.05479         |
| BPS-2G            | 601.08688         |
| BPS-GS            | 505.01161         |



**Supplementary Table 6. MS Parameters for 7-HC sulfate**

| <b>Parameter</b>           | <b>MS Setting<br/>7-hydroxycoumarin sulfate</b> |
|----------------------------|-------------------------------------------------|
| Polarity                   | Negative                                        |
| Ion Source                 | HESI                                            |
| Resolution                 | 70,000                                          |
| Sheath Gas Flow Rate       | 48                                              |
| Aux Gas Flow Rate          | 11                                              |
| Sweep Gas Flow Rate        | 2                                               |
| Spray Voltage (kV)         | 3.40                                            |
| Capillary Temperature (°C) | 300                                             |
| S-lens RF Level            | 40.0                                            |
| Aux Gas Heater Temp (°C)   | 413                                             |

**Supplementary Table 7. MS Parameters for 7-HC glucuronide**

| <b>Parameter</b>           | <b>MS Setting<br/>7-hydroxycoumarin glucuronide</b> |
|----------------------------|-----------------------------------------------------|
| Polarity                   | Positive                                            |
| Ion Source                 | HESI                                                |
| Resolution                 | 70,000                                              |
| Sheath Gas Flow Rate       | 48                                                  |
| Aux Gas Flow Rate          | 11                                                  |
| Sweep Gas Flow Rate        | 2                                                   |
| Spray Voltage (kV)         | 3.00                                                |
| Capillary Temperature (°C) | 300                                                 |
| S-lens RF Level            | 60                                                  |
| Aux Gas Heater Temp (°C)   | 413                                                 |

**Supplementary Table 8. MS Parameters for BPAF and BPS Metabolites**

| <b>Parameter</b>           | <b>MS Setting<br/>BPAF or BPS Metabolites</b> |
|----------------------------|-----------------------------------------------|
| Polarity                   | Negative                                      |
| Ion Source                 | HESI                                          |
| Resolution                 | 70,000                                        |
| Sheath Gas Flow Rate       | 48                                            |
| Aux Gas Flow Rate          | 11                                            |
| Sweep Gas Flow Rate        | 2                                             |
| Spray Voltage (kV)         | 2.20                                          |
| Capillary Temperature (°C) | 300                                           |
| S-lens RF Level            | 50                                            |
| Aux Gas Heater Temp (°C)   | 413                                           |

**Supplementary Table 9. Metabolic clearance assay MS Parameters (7-HC, BPAF, and BPS)**

| <b>Parameter</b>           | <b>MS Setting<br/>7-hydroxycoumarin/BPAF/BPS</b> |
|----------------------------|--------------------------------------------------|
| Polarity                   | Negative                                         |
| Ion Source                 | HESI                                             |
| Resolution                 | 70,000                                           |
| Sheath Gas Flow Rate       | 48                                               |
| Aux Gas Flow Rate          | 11                                               |
| Sweep Gas Flow Rate        | 2                                                |
| Spray Voltage (kV)         | 3.40                                             |
| Capillary Temperature (°C) | 300                                              |
| S-lens RF Level            | 40.0                                             |
| Aux Gas Heater Temp (°C)   | 413                                              |
